# Supplementary material for: Development of a Microfluidic Array to Study Drug Response in Breast Cancer
Source: MDPI journal article supplement (doi:10.3390/molecules24234385), 2019-11-30
Supplement: s1 [file s1]

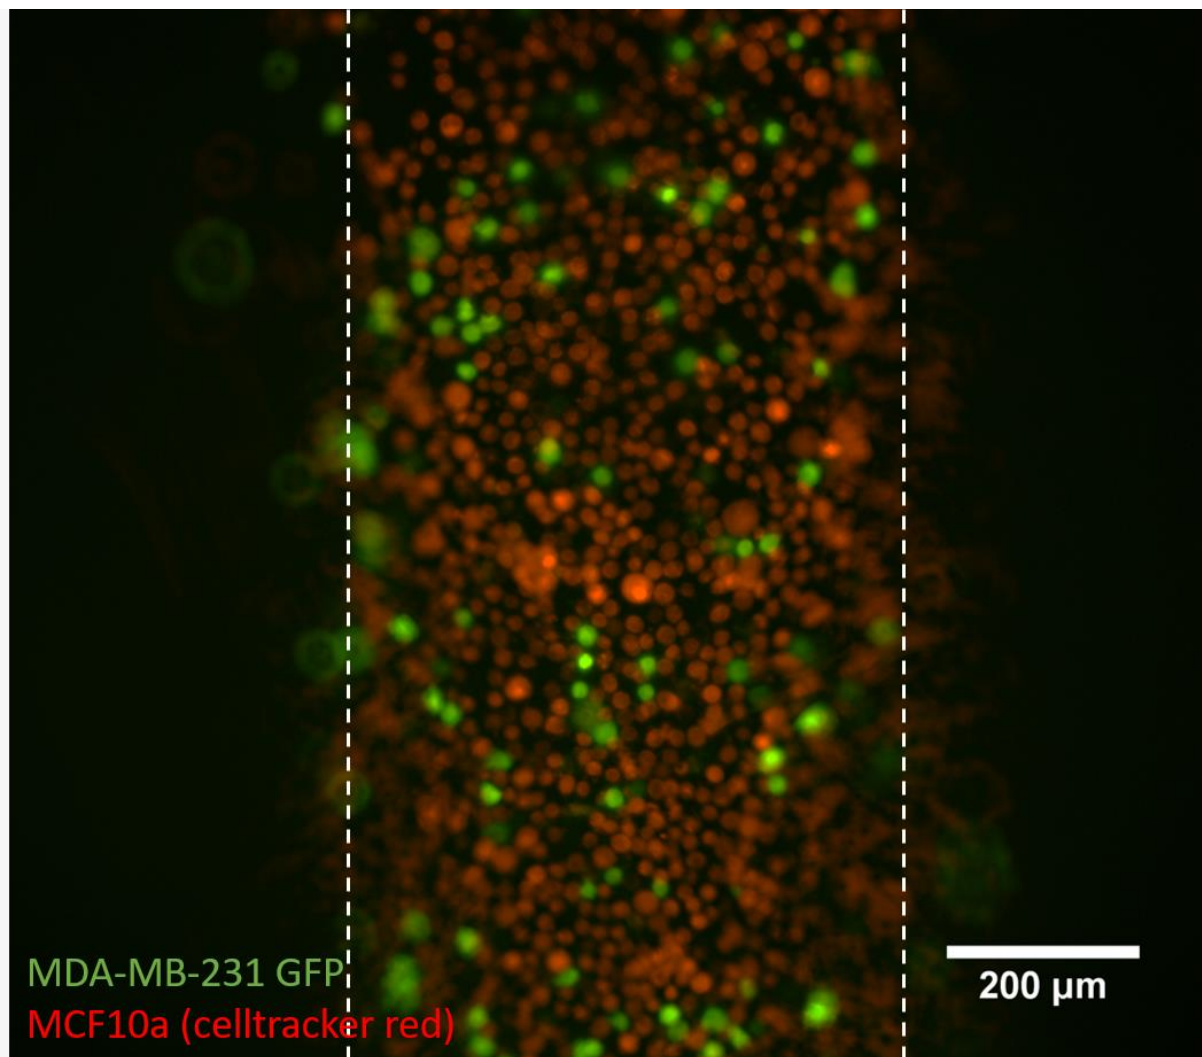

Figure 1. Fluorescence microscopy image of MCF10a (red) and MDA-MB-231 transfected with green fluorescent protein (green), immediately after adhesion.
